# Supplementary material
Source: Springer Nature journal article supplement (https://www.springermedizin.de/resource/supplementary/12883_2013_939_MOESM1_ESM.pdf/9456386)
Supplement: MOESM1 [file 9456386]

**Patients Initiating GA**

n = 12,144

**Remained on GA  
for entire analysis  
period**  
n = 5,178 (42.6%)

**Gap in Therapy**  
n = 6,369  
(52.4%)

**Switched  
Therapies**  
n = 254 (2.1%)

**Combination  
of GA and  
Other Therapy**  
n = 233 (1.9%)

**Re-initiated GA**  
n = 4,101  
(64.4%)

**Combination  
of GA and  
Other Therapy**  
n = 35 (0.5%)

**Switched  
Therapies**  
n = 273 (4.3%)

**Stopped All  
Therapy**  
n = 1,960  
(30.8%)
